# Supplementary material for: Effect of Amylopectin Content on Mechanical, Barrier and Thermal Properties of Plasticized Starch/Chitosan Films
Source: MDPI journal article supplement (doi:10.3390/polysaccharides4030015), 2023-07-24
Supplement: s1 [file s1]

## Effect of amylopectin content on mechanical, barrier and thermal properties of plasticized starch/chitosan films

### Supplementary material

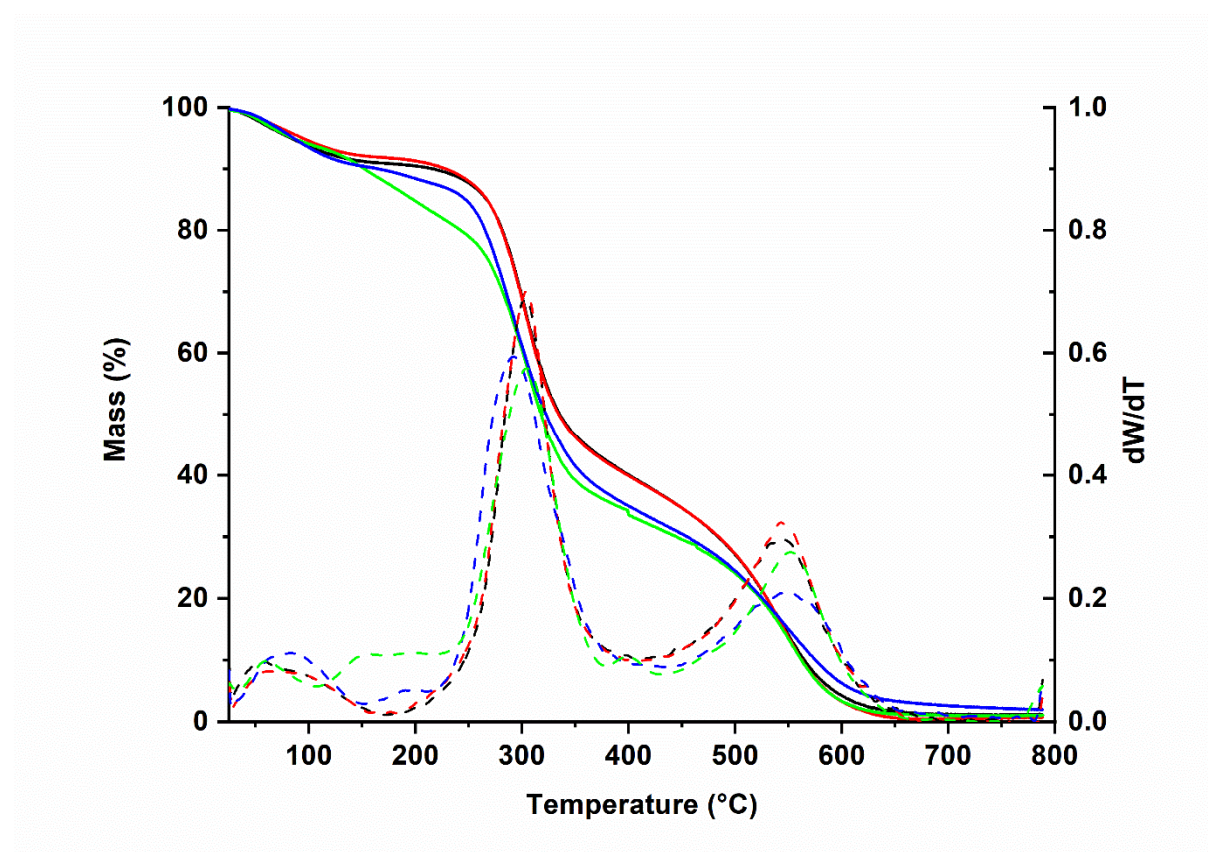

**Figure S1.** Thermogravimetric (solid line) and DTG (dash line) curves of films (synthetic air and heating rate 10 °C min<sup>-1</sup>). In — QA73; — QA73EG; — QA73GL and — QA73SO

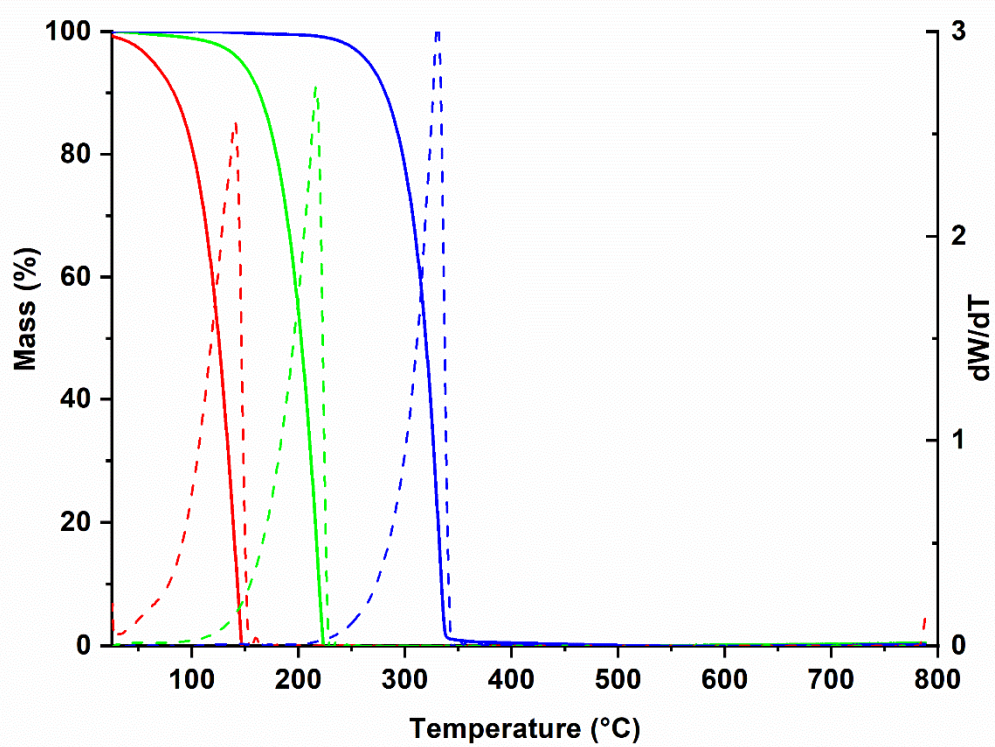

**Figure S2.** Thermogravimetric (solid line) and DTG (dash line) curves of the polyols (synthetic air and heating rate 10 °C min<sup>-1</sup>). In; — **EG**; — **GL** and — **SO**

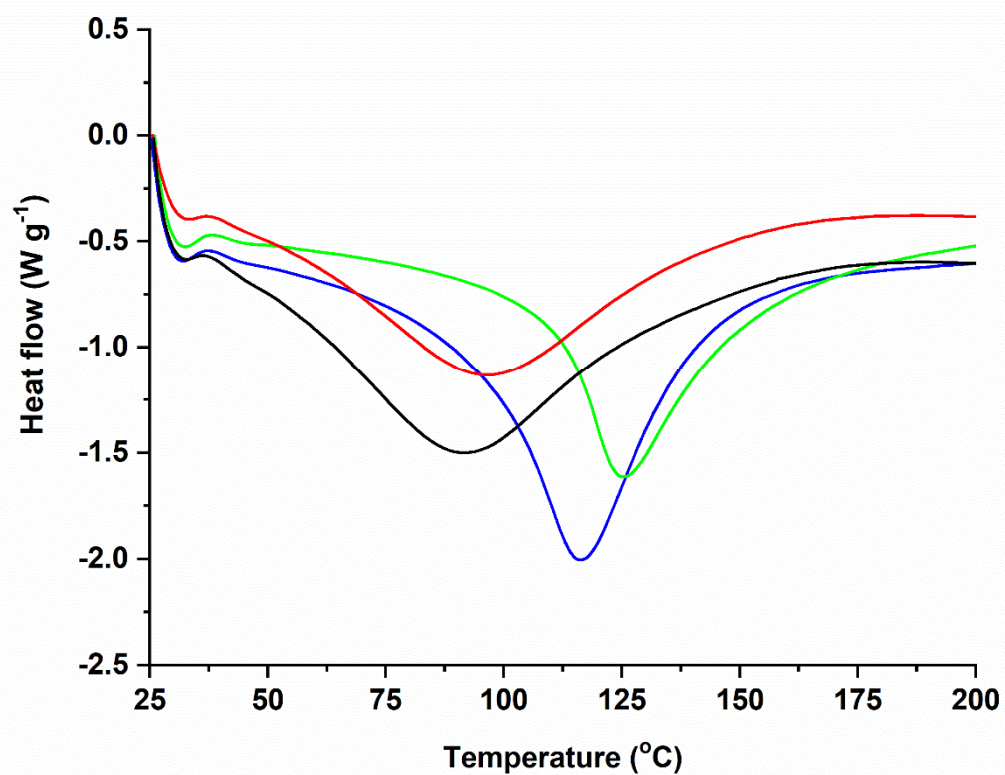

**Figure S3.** DSC curves of films (synthetic air and heating rate 10 °C min<sup>-1</sup>). In — QA100; — QA100EG; — QA100GL and — QA100SO

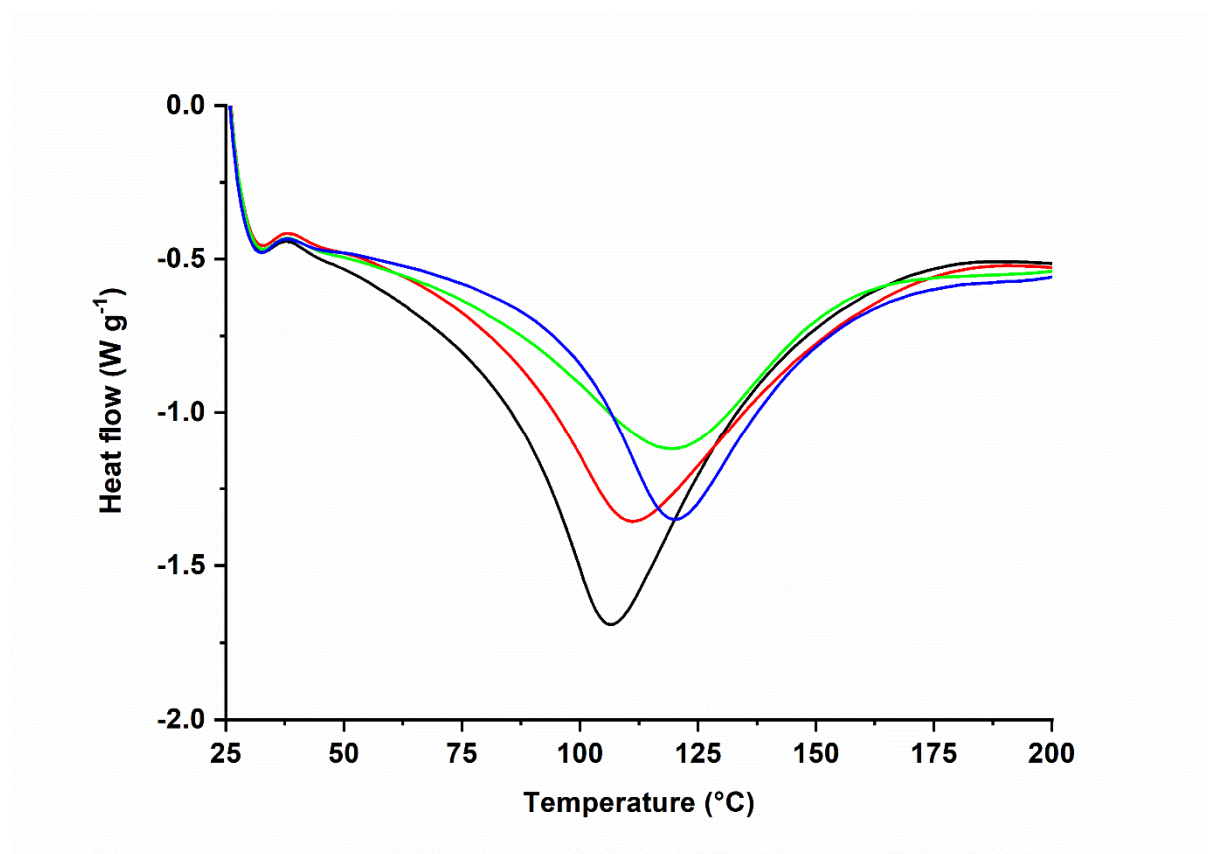

**Figure S4.** DSC curves of films (synthetic air and heating rate 10 °C min<sup>-1</sup>). In — QA73;  
— QA73EG; — QA73GL and — QA73SO



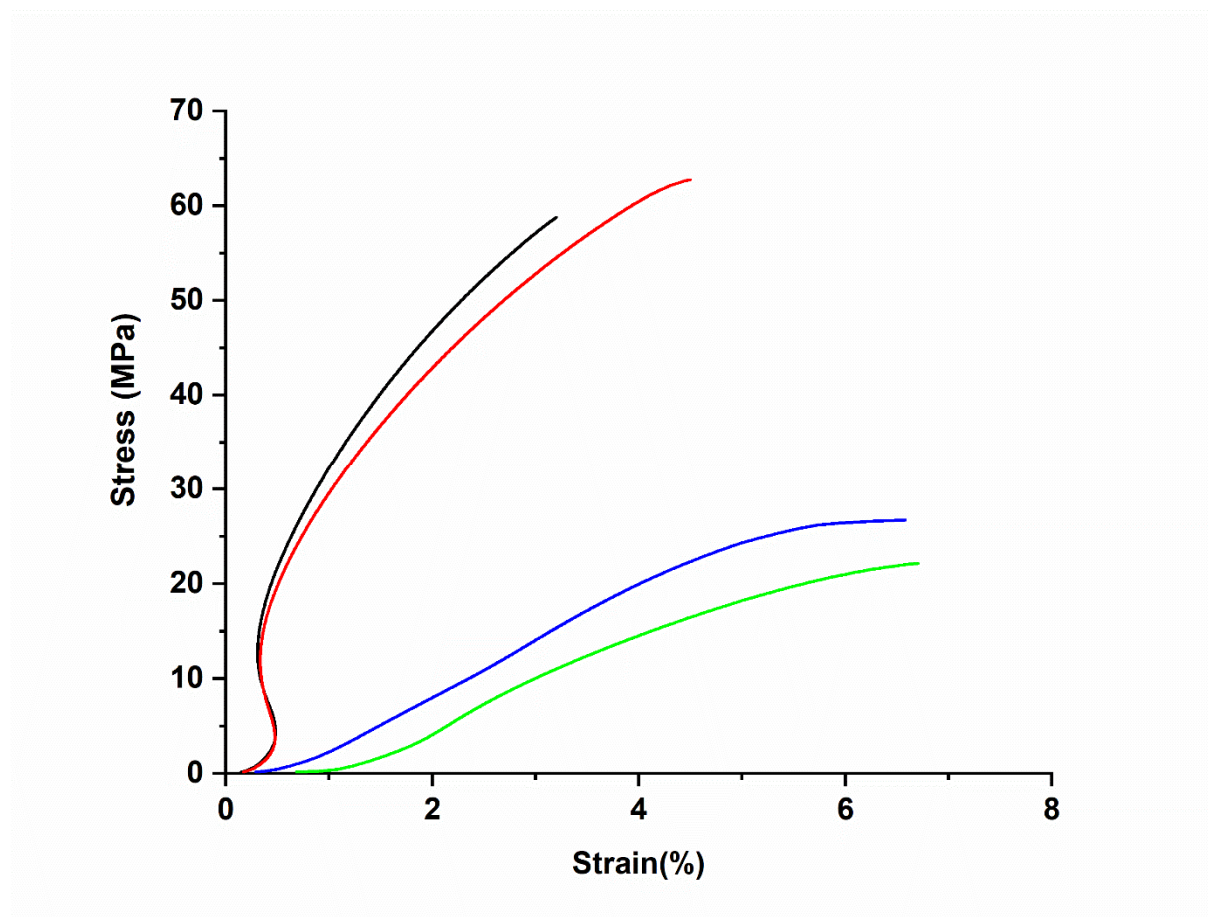

**Figure S5.** Representative curve of stress-strain of the films. In — QA73;  
— QA73EG; — QA73GL and — QA73SO

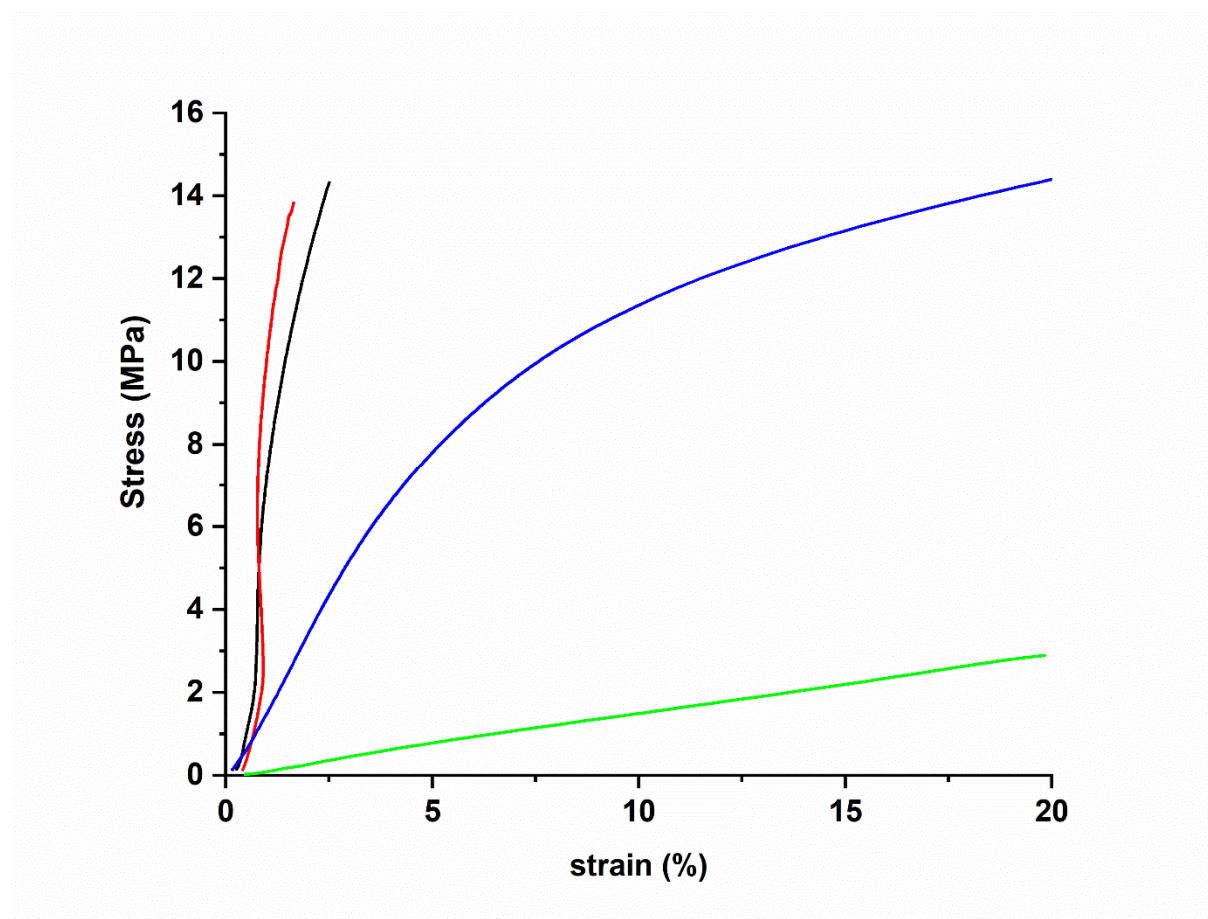

**Figure S6.** Representative curve of stress-strain of the films. In — QA100;  
— QA100EG; — QA100GL and — QA100SO
